# Supplementary material for: Mechanical ordering of pigment crystallites in oil binder: Can EPR reveal the gesture of an artist?
Source: Copernicus journal article supplement (doi:10.5194/mr-2022-13), 2022-07-08
Supplement: Supplementary file [file mr-2022-13-AC1-supplement.pdf]

## Point-by-point reply to referee # 1 for the manuscript:

*Mechanical ordering of pigment crystallites in oil binder: Can EPR reveal the gesture of an artist?*, by E. Garel, L. Binet, and D. Gourier.

We sincerely thank the reviewer for his detailed and critical reading of the manuscript, particularly the theoretical part, which also allow us to address some points that need to be clarified.

**Comment #1:** *The discussion mentions that the crystallites are platelets. Authors should provide experimental evidence that the crystallites in their samples preparations are indeed platelets. There is a reference for this (Bloise, 2016), but the preparation procedure in that cited paper appears somewhat different.*

**Response:** It is important to note that the shapes of crystallites are mainly determined by the crystallographic structure of the mineral. When the structure is composed of covalent two-dimensional sheets linked by weaker interactions, the crystals are always lamellar. This is the case of cuprorivaite, which belongs to the group of phyllosilicates, all of whose minerals have the form of platelets (this is the case of micas, clay minerals etc.). The structure of cuprorivaite is made up of double layers of corner-sharing  $[\text{SiO}_4]$  tetrahedra, separated by a layer of  $\text{Ca}^{2+}$  ions. It is this two-dimensional structure that dictates the platelet shape of the crystallites, regardless of the route of synthesis (natural or artificial).

A paragraph has been added to clarify this point (lines 45 to 49, in red).

**Comment #2:** *It is stated that the g-parallel axis is along the crystal c axis and that the c axis is normal to the platelet plane. Evidence for this should be presented, or cited, since it is essential for the interpretation of the data.*

**Response:** This is an important point, thank you. The structure of cuprorivaite is tetragonal, with space group  $P4/ncc$ , which means that the crystallographic c axis ( $C_4$  axis) is normal to the silicate layers, and thus to the platelets.  $\text{Cu}^{2+}$  ions occupy octahedral sites with  $D_{4h}$  point symmetry, with the  $C_4$  axis (which is also the g-parallel axis) parallel to the crystallographic c-axis, and thus normal to the platelet plane.

A sentence has been added to show that  $g//$  is normal to the platelets (lines 48- 50, in red).

**Comment #3:** *In the discussion, it is hypothesized that the orientational distribution is affected by gravity and depends on whether the sample plane is horizontal or vertical during film drying. Only the horizontal case is shown experimentally. Why not the vertical? This would support the discussion that suggests that the platelets would then orient differently. Without experimental data on vertically dried samples, the discussion about the role of gravity is pure speculation and not useful.*

**Response:** We agree that the discussion on the effect of gravity on the orientation distribution is speculative regarding the effect of the vertical position of the sample. It was not possible to test this effect experimentally because binding-oil is a viscous liquid that dries very slowly. This liquid flows down when the sample is placed vertically. A sentence has been added in Section 5 to clarify this point (lines 288-289, in red).

**Comment #4:** *How are the 25x2-3 mm sample strips rotated around the axis perpendicular to the sample plane? This cannot simply be achieved by putting the sample strip into an EPR tube and rotating the EPR tube around its axis which is along the lab Y0 axis (Fig.3) in a standard EPR spectrometer. The experimental setup should be described in more detail.*

**Response:**

In that case, samples with size 2 x 2 mm<sup>2</sup> that fit into standard sample tubes were used. This has been added in the experimental section (lines 59-60, in red).

**Comment #5:** *Were all samples dried with the application plane horizontal? This should be clarified in the Experimental section.*

**Response:**

Yes. This has been clarified in the experimental section (lines 52-53, in red).

**Comment #6:** *To fully describe the experimental setup, it is not sufficient to specify just the rotation axis relative to the sample (e.g, Z and Y in Fig.6), but rather (i) the orientation of the sample in the spectrometer (lab frame), and (ii) the rotation axis in the lab frame. Only then is the description complete.*

**Response:**

The rotation axis in the laboratory frame was the Y<sub>0</sub> axis. The sample setting in the laboratory frame has been specified in the captions of Figures 4, 6 and 9 (in red).

**Comment #7:** *In general, it is more correct to refer to "random orientation distribution" as "uniform orientational distribution" or "isotropic orientational distribution". In analogy, a "non-random distribution" is better referred to as "non-uniform". This applies to several places in the manuscript.*

**Response:**

We agree with the reviewer's comment and the text has been corrected accordingly.

**Comment #8:** *The reduction from the triple sum in Eq.(5) to the single sum in Eq.(6) should be shown mathematically, to improve clarity and rigor. In my understanding, one angle can be dropped because of the observed rotational symmetry of the EPR spectrum when the sample rotated around the Z axis. But what is the reason the second angle is dropped? The axial symmetry of the EPR spectrum?*

**Response:**

The reviewer is right. The fact that the probability density  $\mathcal{P}(\Omega)$  does not depend on angles  $\alpha$  and  $\gamma$  is a consequence of *both* the rotational symmetry about the sample Z-axis *and* the axial symmetry of the g-factor (spectrum independent on any rotation of a crystallite about the molecular z-axis). Since the general expansion  $\mathcal{P}(\Omega) = \sum_{l=0}^{\infty} \sum_{m=-l}^l \sum_{n=-l}^l p_{lmn} D_{mn}^{(l)}(\Omega)$  (Eq. 5) is a linear combination of functions of angles  $(\alpha, \beta, \gamma)$  where the dependence on  $\alpha$  and  $\gamma$  arises from terms with non-zero values of  $n$  or  $m$ , the only way to get rid of the  $\alpha$  and  $\gamma$  dependence is to set  $p_{lmn} = p_l \times \delta_{n,0} \times \delta_{m,0}$ . This selects only terms with  $n = m = 0$  in Eq. 5, thus yielding Eq. 6.

An explanatory sentence has been added to the text (lines 130-134, in red).

**Comment #9:** *Eq.(3) is only approximately correct, since the transition probability depends on the g-factor along the microwave B1 field - for this, all three Euler angles are in principle needed. See e.g. the textbook by J.R.Pilbrow. The approximation inherent in Eq.(3) should be explicitly stated.*

**Response:**

The reviewer is right again, and correction is made in Eq. 3. However, when the g-factor anisotropy is very weak as is the case here,  $\omega(\varphi, \theta, \psi)$  is almost constant and can be dropped. More specifically, it is dropped from Eq. 7 to justify the integration over  $\theta$  only, in the right-hand member.

**Comment #10:** *Spectra simulations for the case in Fig.6(a) are missing from the SI.*

**Response:**

These spectra were added in the SI (new figure S2).

**Comment #11:** *What is the reason the spectra in Fig.6a are more noisy than all the other experimental spectra presented in the paper?*

**Response:**

It is just because in that case the sample was smaller (2x2 mm<sup>2</sup>) than other samples (25x2 mm<sup>2</sup>).

**Comment #12:** *The lines in Fig.5(b) and Fig.10 are misleading, as they suggest non-zero contributions for odd l. I suggest to remove these lines and present the data in these figures as is done in Fig.8.*

**Response:**

The lines in Figure 5b has been removed. We however prefer keeping the lines in Figure 10 for sake of clarity, given the large number of intermixed data points. We specified that these lines are only guides for the eye and that the odd-order coefficients are zero (lines 248-249, in red).

**Comment #13:** *In Figs. 8 and 10, the red dashed line should be removed. It suggests a continuous function, whereas the x axis is discrete. In this context, the tick marks in Fig.10 every 0.4 on the x axis make no sense.*

**Response:**

The figures were corrected according to the reviewer's request.

**Comment #14:** *The left-hand side of Eq.(S3) is missing the omega(Omega') factor.*

**Response:**

Eq. S3 was corrected. In addition, a comment was added in the SI (in red) justifying why  $\omega(\Omega')$  was dropped in the following equations on the basis that  $\omega(\Omega')$  is almost independent of  $\Omega'$ .

**Comment #15:** *What happened to the first integral in (S3)? Shouldn't there be an additional  $2\pi$  factor for this integral appearing in (S5)?*

**Response:**

True. Equation S5 has been corrected accordingly.

**Comment #16:** *Figure S1 should include the simulation for all spectra in Fig. 4, not only a subset. Same applies to Figs. S2-S4.*

**Response:**

The requested simulations were added, see Fig. S1.

**Comment #17:** *It should be stated somewhere that the odd-integer components of the orientational distribution give an EPR spectrum that appears isotropic. Therefore, as far as I understand it, odd  $l$  cannot be distinguished from  $l=0$ .*

**Response:**

The odd-integer components do not yield an isotropic EPR spectrum. As an example, we show below theoretical spectra calculated from Eq. S6 in the case  $p_0 = 1$  and  $p_l = 0$  for  $l > 0$  (" $l = 0$  only, isotropic case") and in the case  $p_1 = 1$  and  $p_l = 0$  for  $l \neq 1$  (" $l = 1$  only").

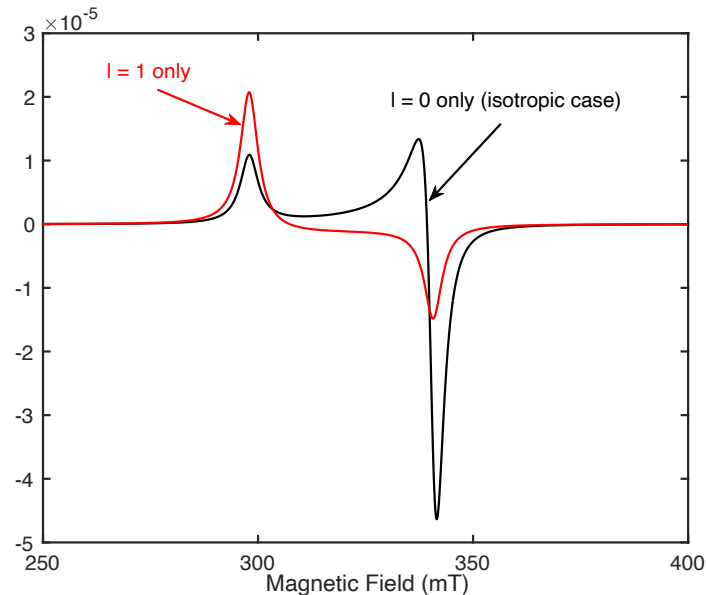

The EPR spectra are clearly different.

**Comment #18:** - Line 113: *matrice -> matrix*

- *The surname of the last author in the Hentschel reference is Spiess, not Speiss.*

- *The first line in SI section 2 should refer to Eq. S6, not Eq. S7.*

- *Eq.(S2) should say  $p_l$  and not  $p_{\{l00\}}$ , to be consistent with other equations.*

- *After Eq.(S2), it should say "determines an orientation  $\Omega$ " (prime is missing)*

**Response:**

All these corrections have been made.
